# Supplementary material for: Head group configuration increases the biocompatibility of cationic lipids for nucleic acid delivery
Source: Royal Society of Chemistry journal article supplement (doi:10.1039/c7tb00317j), 2017-01-01
Supplement: c7tb00317j1.pdf [file c7tb00317j1.pdf]

## Supporting information

Head group configuration increases biocompatibility of cationic lipids for nucleic  
acids delivery

Gerile Gerile,<sup>‡</sup> Tsogzolmaa Ganbold,<sup>‡</sup> Yizheng Li, and Huricha Baigude\*

*School of Chemistry & Chemical Engineering, Inner Mongolia University, 235 West  
College Road, Hohhot, Inner Mongolia, 010020, PR China*

<sup>‡</sup>These authors contributed equally to this work.

\*Correspondence to:

Dr. Huricha Baigude, School of Chemistry & Chemical Engineering, Inner Mongolia  
University, 235 West College Road, Hohhot, Inner Mongolia Autonomous Region,  
010020 P.R.China, Fax: +86-471-4993165, e-mail: [hbaigude@imu.edu.cn](mailto:hbaigude@imu.edu.cn)

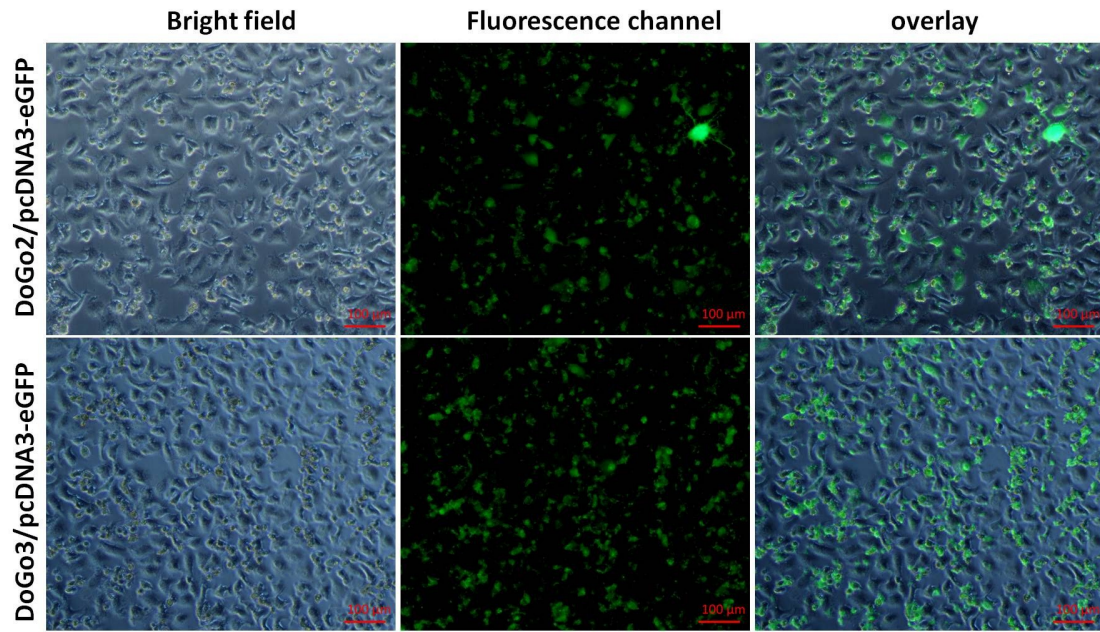

**Supplementary Figure 1.** Transfection of HeLa cells with pcDNA3-eGFP complexed to either DoGo2 or DoGo3 lipids. HeLa cells were treated with DoGo2/pcDNA3-eGFP, or DoGo3/pcDNA3-eGFP, respectively. 48 h after the transfection, expression of GFP was observed under a fluorescence microscope.
